# Supplementary material for: Oxide-derived nanostructured metallic-glass electrodes for efficient electrochemical hydrogen generation
Source: Royal Society of Chemistry journal article supplement (doi:10.1039/c7ra02954c), 2017-01-01
Supplement: c7ra02954c1.pdf [file c7ra02954c1.pdf]

## Supporting Information

### Oxide-Derived Nanostructured Metallic-Glass Electrode for Efficient Electrochemical Hydrogen Generation

*Shenghan Gao, Jili Jia, Shuangqin Chen, Hengwei Luan, Yang Shao\* and Kefu Yao*

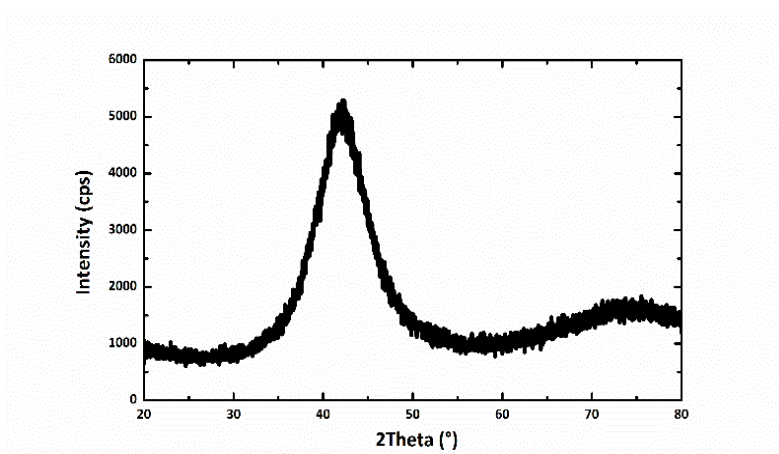

Fig. S1 XRD spectrum of oxidized MG plate annealing at 280 °C for 10 minutes

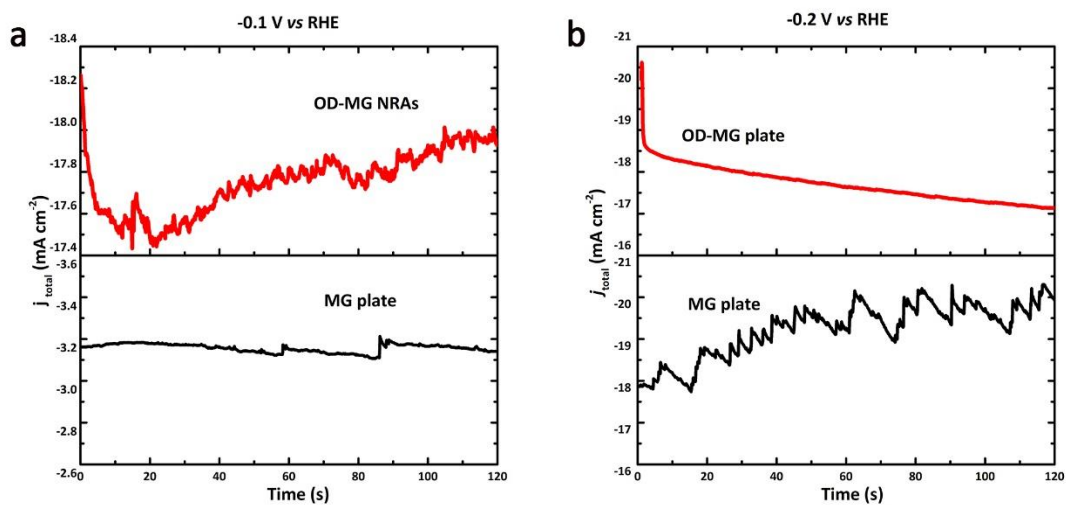

Fig. S2 Current density ( $j_{total}$ ) as a function of time for the untreated MG plate, (a) the oxide-derived MG nanorod arrays (OD-MG NRAs) at  $-0.1\text{V}$  vs RHE and (b) the oxide-derived MG plate (OD-MG plate) at  $-0.2\text{V}$  vs RHE in  $0.5\text{ M H}_2\text{SO}_4$  electrolytes. (a) OD-MG NRAs exhibited a high initial  $j_{total}$ , which stems from the reduction of the nickel oxide layer in the initial period of electrolysis. Subsequently, the current decreased to a point upon gradual consumption, because of a limited amount of the oxide. In contrast, the untreated flat MG showed constant low  $j_{total}$ . (b) At a much negative potential of  $-0.2\text{ V}$  vs RHE, a dramatic decrease of  $j_{total}$  was observed in the OD-MG plate, which also resulted from the reduction of large amount of NiO layer.

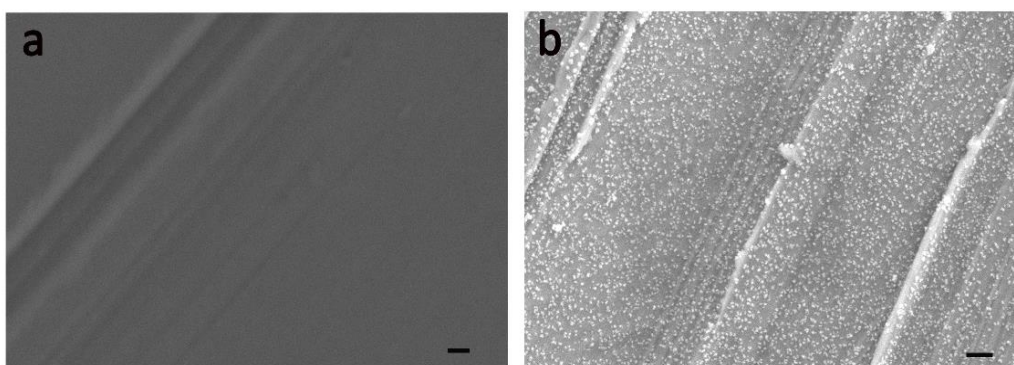

Fig. S3 SEM images of (a) untreated MG plate and (b) OD-MG plate after electroreduction process, which clearly show that numerous nanoparticles densely covered the surface of OD-MG plate. scale bar:  $200\text{ nm}$ .

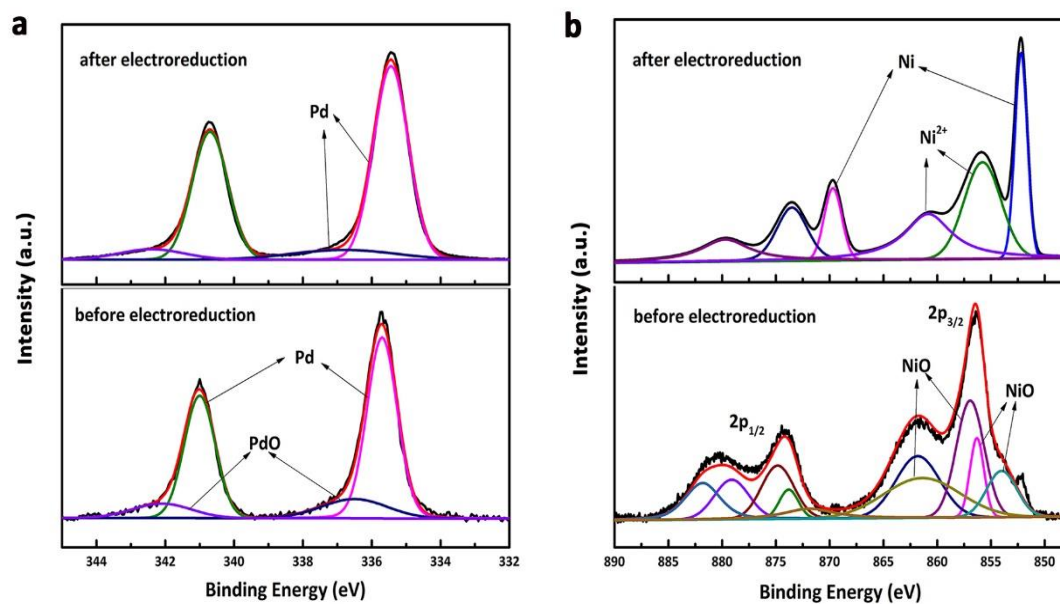

Fig. S4 (a) Pd 3d spectra and (b) Ni 2p spectra of the oxide-derived MG plate (OD-MG plate) before and after electroreduction. For the OD-MG plate before electroreduction, the Ni 2p<sub>3/2</sub> at 854.0 eV corresponding to the NiO was observed in Fig. S4b. After electroreduction, the Ni 2p<sub>3/2</sub> peak shifted to the binding energy of 852.2 eV which corresponds to the Ni formation. The Ni 2p XPS spectrum after electroreduction revealed the surface of OD-MG plate was metallic Ni without any Ni oxide, which confirmed the composition of nanoparticles is metallic Ni.

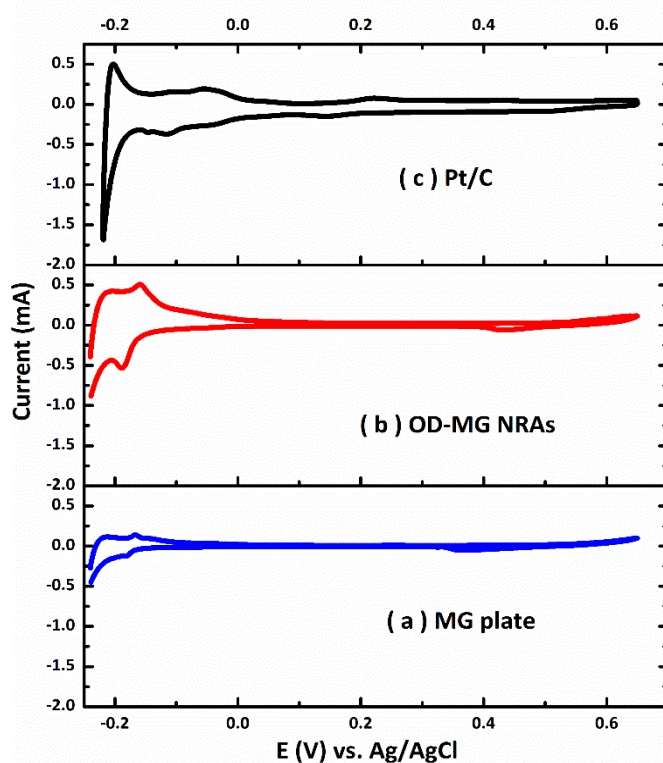

Fig. S5 Cyclic voltammograms in 0.5 M H<sub>2</sub>SO<sub>4</sub> solution at a sweep rate of 10 mV/s for (a) MG plate, (b) OD-MG NRAs and (c) Pt/C electrodes.

The electrochemically active surface area (ECSA) of the electrodes was estimated from the amount of absorbed hydrogen in the hydrogen underpotential deposition (H-UPD) region of the cyclic voltammogram. The area of H-adsorption can be used to estimate the ECSA of the electrodes, according to the following equation:

$$\text{ECSA} = \frac{Q_H}{2.1 \times 10^{-4}} \text{ cm}^2$$

where,  $Q_H$  represents the charge exchanged during the adsorption of hydrogen on a catalyst's surface and  $2.1 \times 10^{-4} \text{ C/cm}^2$  is taken as the charge required to oxidize a monolayer of hydrogen on a smooth polycrystalline Pt electrode.<sup>1</sup> According to the equation, the resulting ECSA for MG plate, OD-MG NRAs and Pt/C are 20.3 cm<sup>2</sup>, 47.4 cm<sup>2</sup> and 98.9 cm<sup>2</sup>, respectively.

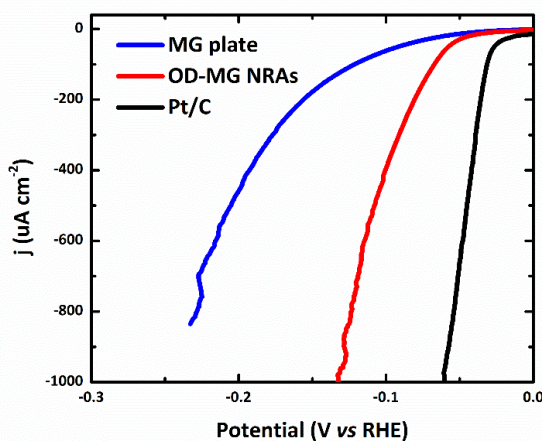

Fig. S6 Current density normalized by ECSA plotted against the applied

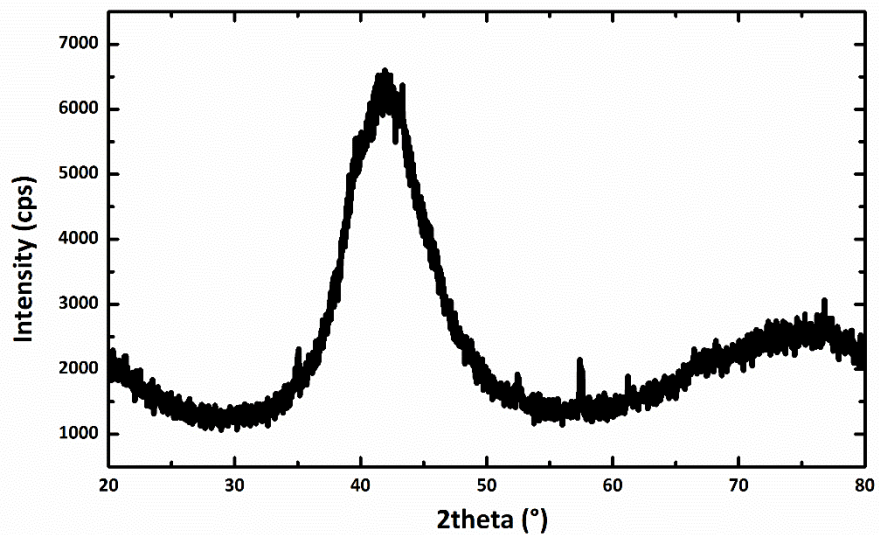

Fig. S7 XRD pattern of the OD-MG NRAs after long-term HER testing, which displays a broad diffraction maximum with few crystalline peaks, confirming the amorphous structure of the final material.

#### Reference

1. Y. Zhu, M. Yuan, L. Deng, R. Ming, A. Zhang, M. Yang B. Chai and Z. D. Ren, *RSC Adv.*, 2017, **7**, 1553-1560.
